# Supplementary material for: Left Ventricular Diastolic Dysfunction Assessment with Dual-Source CT
Source: PLoS One. 2015 May 18;10(5):e0127289. doi: 10.1371/journal.pone.0127289 (PMC4436312; doi:10.1371/journal.pone.0127289)
Supplement: S2 Dataset — (XLS) [file pone.0127289.s002.xls]

## Sheet: S2_Table
NO.	Sex	Age	BSA	BSA	LAVmax	LAVmin	LVp	Indexed LAVmax	Indexed LAVmin	Indexed LAVp	LAEF	LA reservoir function	LA conduit function	LA contractile function
1	M	35	2.151	2.15	32.2	10.4	21.7	14.9767	4.83721	10.093	0.677019	2.09615	0.326087	0.520737
2	F	58	1.874	1.87	40.3	17.7	29.5	21.5508	9.46524	15.7754	0.560794	1.27684	0.26799	0.4
3	M	56	1.743	1.74	55.5	18.3	38.5	31.8966	10.5172	22.1264	0.67027	2.03279	0.306306	0.524675
4	F	43	1.761	1.76	50.1	21.1	39.9	28.4659	11.9886	22.6705	0.578842	1.37441	0.203593	0.471178
5	F	42	1.746	1.75	49.1	20.1	39.1	28.0571	11.4857	22.3429	0.590631	1.44279	0.203666	0.485934
6	M	46	1.822	1.82	50.1	22.3	39.8	27.5275	12.2527	21.8681	0.55489	1.24664	0.205589	0.439698
7	F	41	1.749	1.75	45.5	18.3	28.7	26	10.4571	16.4	0.597802	1.48634	0.369231	0.362369
8	M	57	1.741	1.74	37.5	15.1	22.7	21.5517	8.67816	13.046	0.597333	1.48344	0.394667	0.334802
9	F	44	1.454	1.45	30.6	13	22.2	21.1034	8.96552	15.3103	0.575163	1.35385	0.27451	0.414414
10	M	37	1.632	1.63	32.3	12.6	22	19.816	7.73006	13.4969	0.609907	1.56349	0.318885	0.427273
11	M	48	1.822	1.82	35	11.6	21.9	19.2308	6.37363	12.033	0.668571	2.01724	0.374286	0.47032
12	M	46	1.818	1.82	40.5	16.1	26.2	22.2527	8.84615	14.3956	0.602469	1.51553	0.353086	0.385496
13	M	75	1.719	1.72	32.3	12.2	23.1	18.7791	7.09302	13.4302	0.622291	1.64754	0.28483	0.471861
14	F	56	1.509	1.51	43.9	19.3	30.6	29.0728	12.7815	20.2649	0.560364	1.27461	0.302961	0.369281
15	M	62	1.844	1.84	49.9	15	29.4	27.1196	8.15217	15.9783	0.699399	2.32667	0.410822	0.489796
16	F	70	1.584	1.58	41.7	13.9	28.6	26.3924	8.79747	18.1013	0.666667	2	0.314149	0.513986
17	M	69	2.231	2.23	33.9	11.7	25.8	15.2018	5.24664	11.5695	0.654867	1.89744	0.238938	0.546512
18	F	59	1.651	1.65	27	10.9	20.7	16.3636	6.60606	12.5455	0.596296	1.47706	0.233333	0.47343
19	F	40	1.526	1.53	42.3	16.3	23.7	27.6471	10.6536	15.4902	0.614657	1.59509	0.439716	0.312236
20	M	57	1.867	1.87	55.5	22.3	39.4	29.6791	11.9251	21.0695	0.598198	1.48879	0.29009	0.43401
21	M	73	1.738	1.74	66.5	30.4	45.6	38.2184	17.4713	26.2069	0.542857	1.1875	0.314286	0.333333
22	M	64	1.666	1.67	67.1	29.3	43.2	40.1796	17.5449	25.8683	0.563338	1.2901	0.356185	0.321759
23	F	64	1.669	1.67	64.7	28.3	50.2	38.7425	16.9461	30.0599	0.562597	1.28622	0.224111	0.436255
24	M	51	1.999	2	59.6	21.9	42.7	29.8	10.95	21.35	0.63255	1.72146	0.283557	0.487119
25	F	40	1.533	1.53	58.6	21.1	40.5	38.3007	13.7908	26.4706	0.639932	1.77725	0.308874	0.479012
26	F	73	1.67	1.67	63.5	23.5	47.2	38.024	14.0719	28.2635	0.629921	1.70213	0.256693	0.502119
27	M	36	1.736	1.74	62.7	25.4	41	36.0345	14.5977	23.5632	0.594896	1.4685	0.346093	0.380488
28	F	35	1.642	1.64	68.3	30.2	50.3	41.6463	18.4146	30.6707	0.557833	1.26159	0.263543	0.399602
29	M	38	1.628	1.63	68.9	30.8	50.5	42.2699	18.8957	30.9816	0.552975	1.23701	0.267054	0.390099
30	F	33	2.147	2.15	60.7	20.5	48.7	28.2326	9.53488	22.6512	0.662273	1.96098	0.197694	0.579055
31	M	39	2.153	2.15	60.7	21.5	46.1	28.2326	10	21.4419	0.645799	1.82326	0.240527	0.533623
32	F	37	1.629	1.63	56.4	26.3	44.3	34.6012	16.135	27.1779	0.533688	1.14449	0.214539	0.406321
33	F	44	1.449	1.45	54.9	18.9	41	37.8621	13.0345	28.2759	0.655738	1.90476	0.253188	0.539024
34	M	81	1.863	1.86	42.4	18.5	34.3	22.7957	9.94624	18.4409	0.563679	1.29189	0.191038	0.460641
35	F	73	1.667	1.67	58.2	25.5	40.2	34.8503	15.2695	24.0719	0.561856	1.28235	0.309278	0.365672
36	M	57	1.942	1.94	68.7	30.7	45.7	35.4124	15.8247	23.5567	0.55313	1.23779	0.334789	0.328228
37	F	74	1.742	1.74	55.2	22.8	43.7	31.7241	13.1034	25.1149	0.586957	1.42105	0.208333	0.478261
38	M	45	1.97	1.97	59.9	28.5	39.4	30.4061	14.467	20	0.524207	1.10175	0.342237	0.27665
39	M	73	1.739	1.74	43.7	18.8	28.1	25.1149	10.8046	16.1494	0.569794	1.32447	0.356979	0.330961
40	F	46	1.842	1.84	55	20.6	36.4	29.8913	11.1957	19.7826	0.625455	1.6699	0.338182	0.434066
41	F	45	1.968	1.97	50.9	24.1	36.1	25.8376	12.2335	18.3249	0.526523	1.11203	0.290766	0.33241
42	M	51	1.999	2	46.3	21.4	40.3	23.15	10.7	20.15	0.537797	1.16355	0.12959	0.468983
43	M	57	1.943	1.94	49	22	36.3	25.2577	11.3402	18.7113	0.55102	1.22727	0.259184	0.393939
44	F	50	1.522	1.52	52.7	18.2	29.9	34.6711	11.9737	19.6711	0.654649	1.8956	0.432638	0.391304
45	M	46	2.039	2.04	66.7	28.7	41.2	32.6961	14.0686	20.1961	0.569715	1.32404	0.382309	0.303398
46	M	36	2.024	2.02	76.4	36.6	60.1	37.8218	18.1188	29.7525	0.520942	1.08743	0.213351	0.391015
47	F	58	1.866	1.87	84.6	49.7	69	45.2406	26.5775	36.8984	0.41253	0.702213	0.184397	0.27971
48	M	57	1.87	1.87	71.2	46.8	68	38.0749	25.0267	36.3636	0.342697	0.521368	0.0449438	0.311765
49	F	59	1.648	1.65	82.7	47.5	68.2	50.1212	28.7879	41.3333	0.425635	0.741053	0.175333	0.303519
50	F	45	1.844	1.84	80.4	54.5	57.7	43.6957	29.6196	31.3587	0.322139	0.475229	0.282338	0.0554593
51	F	65	1.701	1.7	81.6	47.8	68.5	48	28.1176	40.2941	0.414216	0.707113	0.160539	0.30219
52	M	51	1.995	2	63.9	43.4	53.6	31.95	21.7	26.8	0.320814	0.47235	0.161189	0.190299
53	M	63	1.855	1.86	64.7	32.2	42.6	34.7849	17.3118	22.9032	0.502318	1.00932	0.341577	0.244131
54	M	62	1.837	1.84	65.4	31.5	40.9	35.5435	17.1196	22.2283	0.518349	1.07619	0.374618	0.229829
55	F	50	1.518	1.52	74.1	33.2	59.7	48.75	21.8421	39.2763	0.551957	1.23193	0.194332	0.443886
56	F	65	1.697	1.7	79.9	47.7	62	47	28.0588	36.4706	0.403004	0.675052	0.22403	0.230645
57	M	32	1.72	1.72	77	36	58	44.7674	20.9302	33.7209	0.532468	1.13889	0.246753	0.37931
58	M	57	1.935	1.94	75.75	38.65	58.1	39.0464	19.9227	29.9485	0.489769	0.959897	0.233003	0.334768
59	F	50	1.515	1.52	66.4	40.9	51	43.6842	26.9079	33.5526	0.384036	0.623472	0.231928	0.198039
60	M	36	2.02	2.02	86.3	55.4	62	42.7228	27.4257	30.6931	0.358053	0.557762	0.281576	0.106452
61	F	59	1.641	1.64	70.2	46.6	62	42.8049	28.4146	37.8049	0.336182	0.506438	0.116809	0.248387
62	F	58	1.871	1.87	62	32.5	42	33.1551	17.3797	22.4599	0.475806	0.907692	0.322581	0.22619
63	M	64	1.673	1.67	57.8	28.9	34.8	34.6108	17.3054	20.8383	0.5	1	0.397924	0.16954
64	M	32	1.716	1.72	68	44.4	54	39.5349	25.814	31.3953	0.347059	0.531532	0.205882	0.177778
65	M	52	2.04	2.04	80.6	49.1	64.9	39.5098	24.0686	31.8137	0.390819	0.641548	0.194789	0.243451
66	M	81	1.863	1.86	72.8	44	51	39.1398	23.6559	27.4194	0.395604	0.654545	0.299451	0.137255
67	F	65	1.704	1.7	65.4	32.6	43.4	38.4706	19.1765	25.5294	0.501529	1.00613	0.336391	0.248848
68	M	39	2.23	2.23	148	123	138	66.3677	55.157	61.8834	0.168919	0.203252	0.0675676	0.108696
69	M	59	1.856	1.86	107.1	88	97.6	57.5806	47.3118	52.4731	0.178338	0.217045	0.0887021	0.0983607
70	F	72	1.577	1.58	85.7	57.3	70.8	54.2405	36.2658	44.8101	0.331389	0.495637	0.173862	0.190678
71	F	66	1.651	1.65	86.3	63.7	69.8	52.303	38.6061	42.303	0.261877	0.354788	0.191194	0.0873926
72	M	72	1.58	1.58	75.3	49.7	62	47.6582	31.4557	39.2405	0.339973	0.515091	0.176627	0.198387
73	M	59	1.862	1.86	88.3	61.5	67	47.4731	33.0645	36.0215	0.303511	0.435772	0.241223	0.0820896
74	F	65	1.513	1.51	63.2	47.6	53.8	41.8543	31.5232	35.6291	0.246835	0.327731	0.148734	0.115242
75	M	39	2.229	2.23	92.1	66.3	78	41.3004	29.7309	34.9776	0.28013	0.38914	0.153094	0.15
76	F	66	1.645	1.65	76.4	42.9	47.5	46.303	26	28.7879	0.438482	0.780886	0.378272	0.0968421
77	M	57	1.874	1.87	124.1	90.1	109.9	66.3636	48.1818	58.7701	0.273973	0.377358	0.114424	0.180164
